# Supplementary material for: Nano-porous Al/Au skeleton to support MnO2with enhanced performance and electrodeposition adhesion for flexible supercapacitors
Source: Royal Society of Chemistry journal article supplement (doi:10.1039/d1ra01923f), 2021-01-01
Supplement: d1ra01923f3.pdf [file d1ra01923f3.pdf]

**Nano-porous Al/Au skeleton to support MnO<sub>2</sub> with enhanced performance and electrodeposition adhesion for flexible supercapacitors**

Qian Xu, Zhenya Lu\*, Du Huang, Xingyue Liu, Wenbin Yi, Junning, Gao, Zhiwu Chen,  
Xin Wang, Xiaoyi Fu

School of Materials Science and Engineering, South China University of Technology,  
Guangzhou 510641, China.

\* Corresponding Author E-mail Address: zhylu@scut.edu.cn

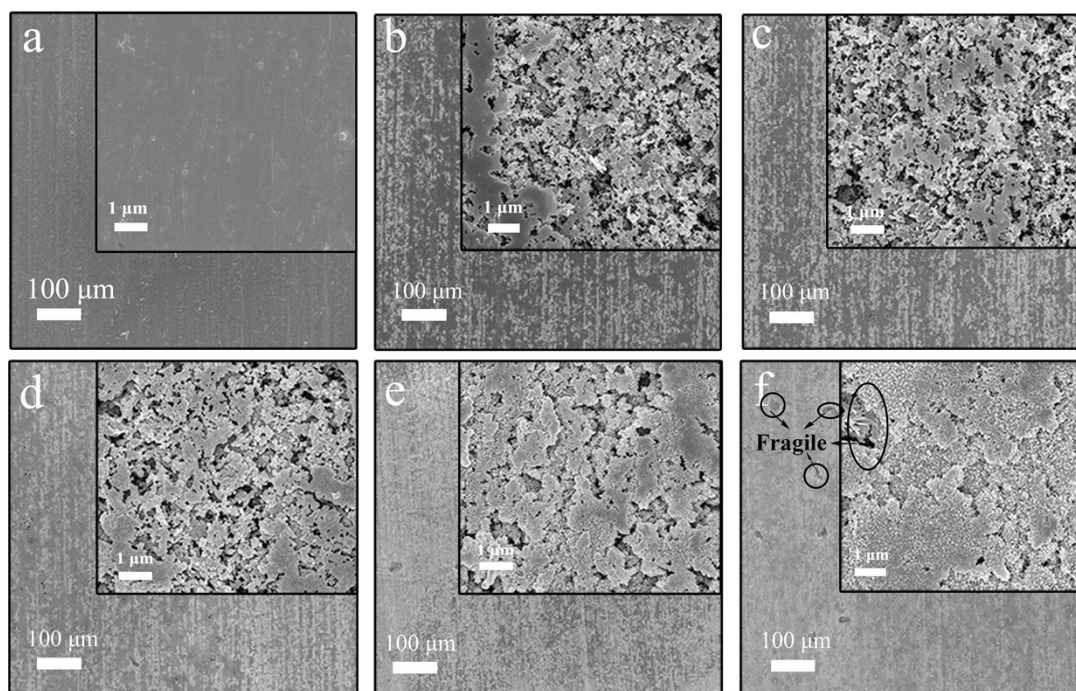

**Figure S1.** SEM images of pristine Al foil (a), A1(b), A2 (c), A4 (d), A5 (e), A6 (f).

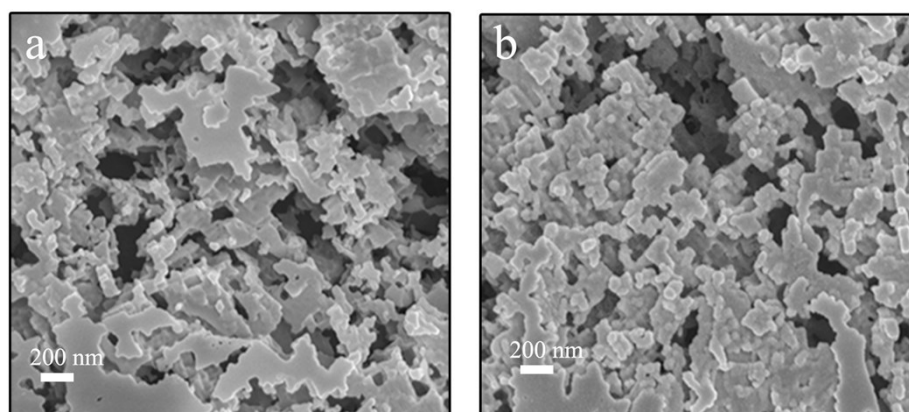

**Figure S2.** SEM images of (a) Al foils, (b) Al/Au foils.

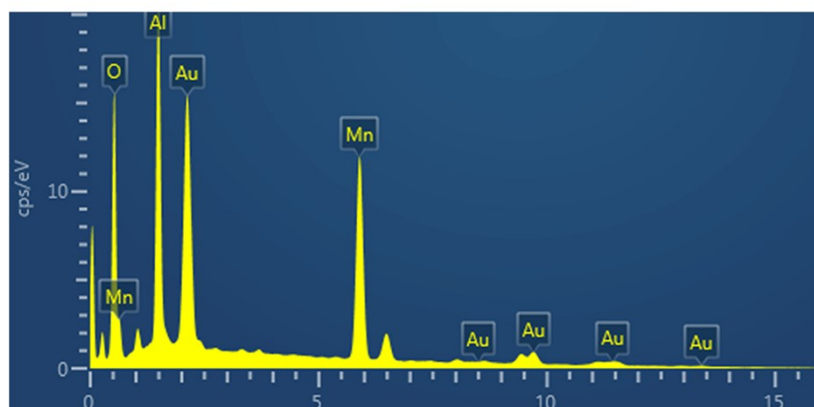

**Figure S3.** EDS spectrum of the AAM3 electrode.

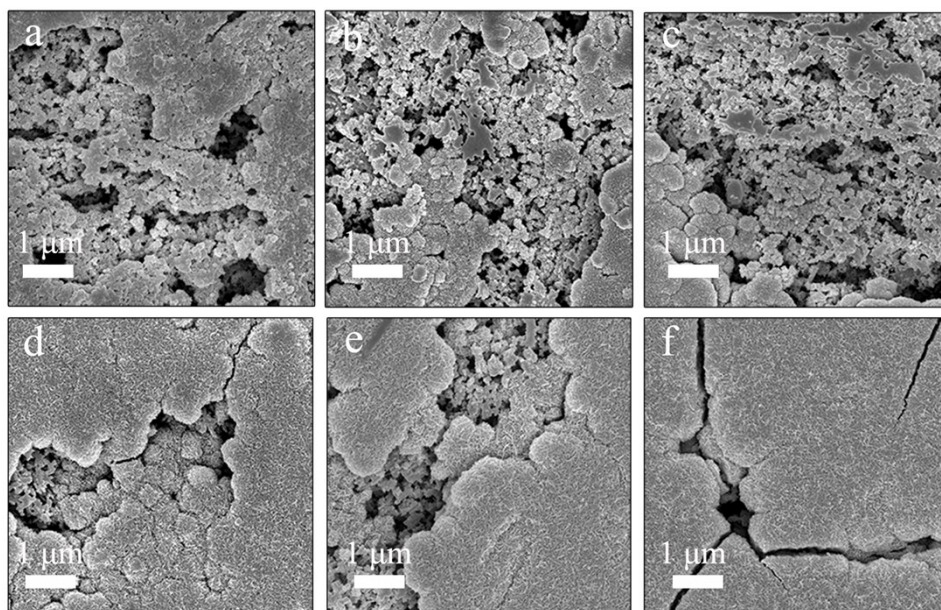

**Figure S4.** The SEM images of the electrodes obtained under the same electrodeposited voltage of + 0.8 V with different deposition time: (a) 10 s, (b) 20 s, (c) 50 s, (d) 100 s, (e) 200 s, (f) 300 s.

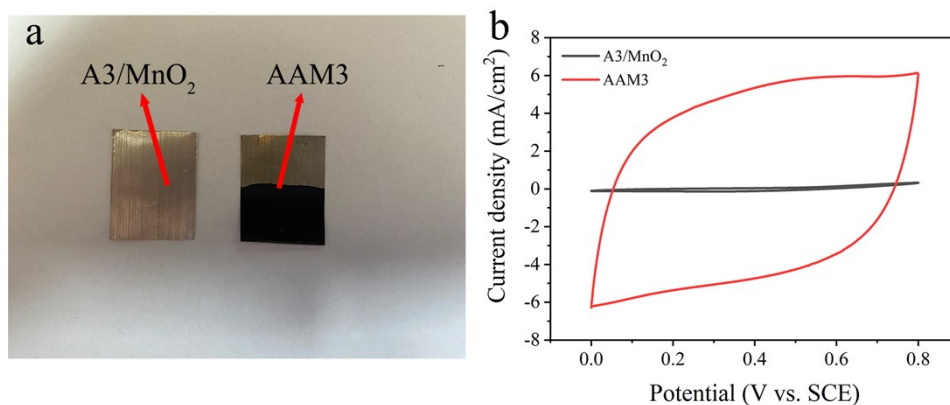

**Figure S5.** Physical and CV images of the A3/MnO<sub>2</sub> and the AAM3 electrode. Without Au layer, MnO<sub>2</sub> can hardly grow onto the Al current collector via electrodeposition.

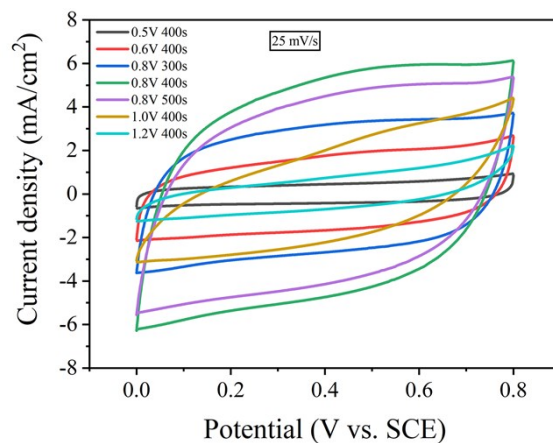

**Figure S6.** CV curves at  $25 \text{ mV s}^{-1}$  of the electrodes obtained under different deposition voltages and times based on A3/Au current collector.

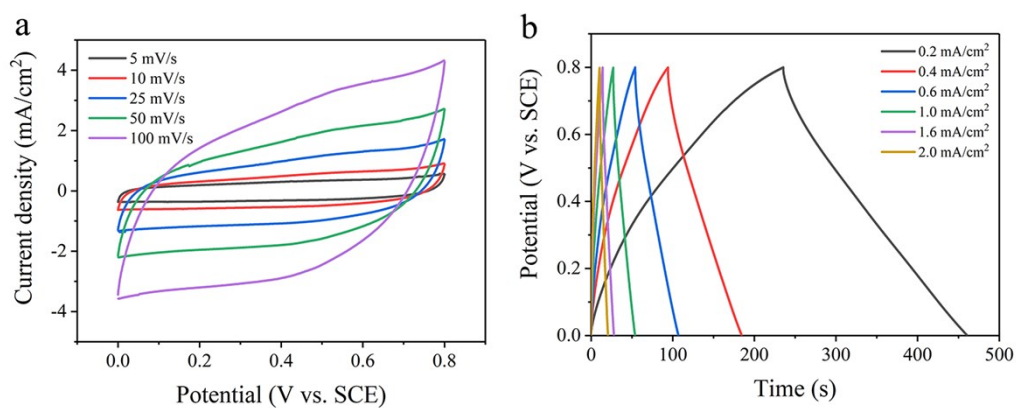

**Figure S7.** CV (a) and GCD (b) of the pristine AAM electrode.



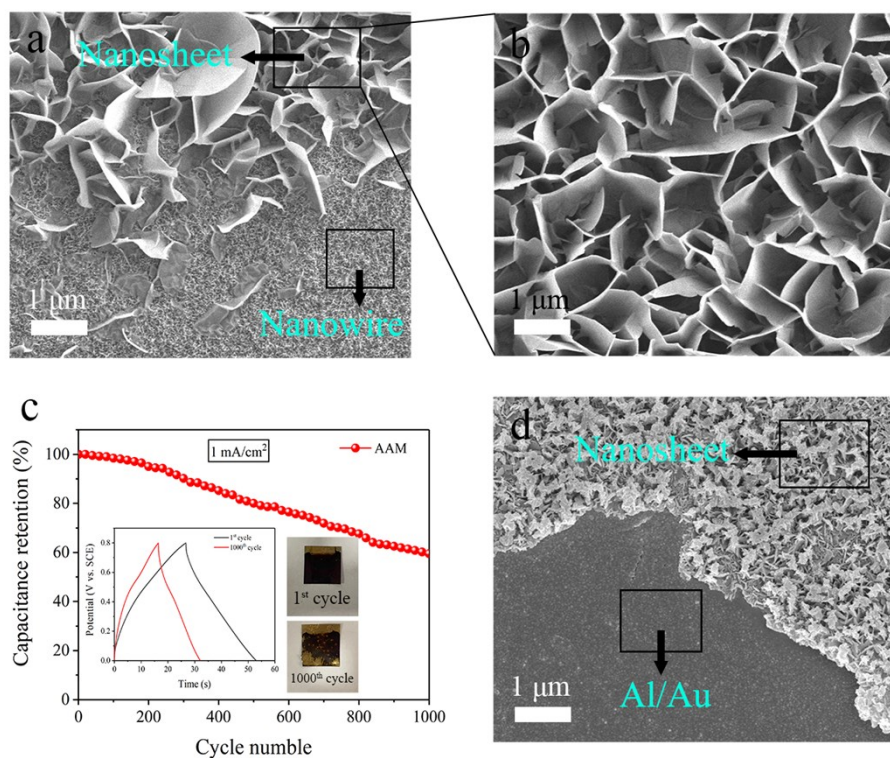

**Figure S8.** (a) The SEM image of the AAM3 electrode after cycling. (b) The enlarged SEM image of MnO<sub>2</sub> nanosheets. (c) The cyclic performance of the AAM electrode with the inset showing the GCD curves and the physical images of the first and the 1000<sup>th</sup> cycle at 1 mA cm<sup>-2</sup>. (d) The SEM image of AAM electrode after cycling.
